# Supplementary material for: Polysulfite, a hypothetical allotrope of sulfur dioxide? A molecular and periodic quantum investigation of covalent oligomeric and one-dimensional XO2-based compounds (X=S, Se)
Source: Royal Society of Chemistry journal article supplement (doi:10.1039/b007960j), 2001-01-01
Supplement: b007960j.doc [file b007960j.doc]

##### Supporting Information

##### for

##### Polysulfite, a hypothetical allotrope of sulfur dioxide?

##### a molecular and periodic quantum investigation of covalent oligomeric and

##### one-dimensional XO2-based compounds (X = S, Se).

Gilles Frapper

Laboratoire de Catalyse en Chimie Organique (CNRS UMR 6503),

Université de Poitiers, 86022 Poitiers Cedex (France).

Fax: (+33) (0)5 49 45 34 99. E.mail: [gilles.frapper@univ-poitiers.fr](mailto:gilles.frapper@univ-poitiers.fr)

#### Received (in Montpellier, France) 29th September 2000, Accepted 27th November 2000

**Figures captions:**

**Figure S1**. Labeled structure for FXn+1O2n+1F **9**-**10** (X = S, Se).

**Figure S2**. Computed structures for FSen+1O2n+1F **10** (n = 1-3). See Tables S10-12.

**Tables: 12**

**Figure S1.** Labeled structure for FXn+1O2n+1F **9**-**10** (X = S, Se). See Tables S6-8 and S10-12.

**Figure S2.** Computed structures for FSen+1O2n+1F **10** (n = 1-3). See Tables S10-12.

**Table S1**. Dissociation energies (kcal mol-1) for SO and SO2.

____________________________________________________

SO SO2

___________ ___________

B3LYP/6-311G* 114.1 *112.5*[a] 221.6 *217.4*

B3LYP/6-311+G(3df)[b] 126.1 *124.5* 250.2 *246.0*

Experimental D0 123.58[c], 123.24[d] 253.97[e]

[a] Zero-point energy corrected energies are given in italics. [b] B3LYP/6-311G* geometry. [c] K. P. Huber, G. Herzberg, *Constants of Diatomic Molecules*, Van Nostrand Reinhold: New York, **1979**. [d] G. Clerbaux, R. Colin, *J. Mol. Spectrosc.* **1994**, *165*, 334. [e] M. W. Chase, C. A. Davies, J. R. Downey, D. J. Frurip, R. A. McDonald, A. N. Syverud, *J. Phys. Chem. Ref. Data* **1985**, 14 (Suppl. 1).

Recently, Bauschlicher and Ricca investigated the SO and SO2 dissociation energies at different levels of theory such as the coupled cluster singles and doubles approach CCSD(T) and using extended basis sets. Their best estimate for the dissociation energy (including spin-orbit, core-valence and scalar relativistic effects, BSSE correction) is 123.04 and 254.07 kcal mol-1 for SO and SO2 respectively. See in : C. W. Jr. Bauschlicher, A. Ricca, *J. Phys. Chem. A.* **1998**, *102*, 8044 and references therein.

**Table S2**. B3LYP/6-311G* geometries (distances in Å, angles in °) and harmonic vibrational frequencies[a] (cm-1) for SeO2 **1** and SO2.

____________________________________________

SeO2 SO2

__________________________ ______________

r 1.622 (1.607)[b] [c] 1.457 (1.430) [e]

 115.1 (113.5) 118.8 (119.3)

a1 bend 358 (372)[d] 509 (518) [f]

a1 sym. str. 925 (923) 1139 (1151)

b1 anti. str. 965 (963) 1324 (1362)

____________________________________________

[a] Without scaling factor.[b] Experimental data are given in parentheses. [c] A. F. Wells*, Structural Inorganic Chemistry*, 5th ed., Clarendon Press: Oxford, 1984, pp. 715. [d] G.W. King, R.C. Meatherall, *J. Mol. Spectrosc.* **1984**, *106*, 196. [e] Y. Morino, Y. Kikuchi, S. Saito, E. Hirota, *J. Mol. Spectrosc.* **1964**, *13*, 95. [f] T. Shimanouchi, Tables of Molecular Vibrational Frequencies Consolidated Volume I, National Bureau of Standards, **1972**, 1-160.

**Table S3**. Calculated total energies (hartrees), ZPVE[a] (kcal mol-1), relative energies RE[b] (kcal mol-1) and E’[b,c] (kcal mol. XO2) for (XO2)x compounds (x = 1, 2 ; X = Se, S).

_____________________________________________________________________

Sym[d] EM1[e] ZPVE EM2[b] RE[b] E’[b] _________________________________________________________

SeO2 **1** C2v -2551.95456 3.2 -2551.99374 - 0

SO2 C2v -548.65596 4.2 -548.71493 - 0

Se2O4 **2**-cis C2v -5103.93336 8.0 -5104.01212 0 -7.7

**2**-trans C2h -5103.93177 7.9 -5104.01109 +0.6 -7.4

S2O4 **4**-cis C2v -1097.27494 10.0 -1097.38996 0 +12.5

**4**-trans C2h -1097.27004 9.9 -1097.38517 +3.0 +14.0

**5** C2v -1097.22779 10.8 -1097.34395 +28.9 +27.0

S4O8 **8** D4h -2194.45652 21.8 -2194.71145 - +23.3

_____________________________________________________________________

[a] Zero-point vibrational energy. [b] B3LYP/6-311+G(3df)// B3LYP/6-311G* level of theory. [c] E’ = E(XO2)2/2 – E(XO2).[d] Symmetry group. [e] B3LYP/6-311G*.

**Table S4**. B3LYP/6-311G* calculated harmonic vibrational frequencies[a] (cm-1) and their intensities[b] (KM mol-1) for Se2O4 **2** and S2O4 **4**-**5** compounds .

(SeO2)2 (SO2)2

_____________________ _________________________________

**2**-cis (C2v) **2**-trans (C2h) **4**-cis (C2v) **4**-trans (C2h) **5** (C2v)

_________________________________________________________

101(0.4) 70 (4.9) 120 (0.2) 80 (2.0) 62 (1.8)

209 (0) 187 (11.4) 278 (0) 239 (5.2) 281 (0)

244 (2.5) 230 (0) 293 (0.4) 322 (0) 387 (9.8)

274 (12.7) 267 (0) 329 (0) 331 (0) 421 (5.2)

280 (6.6) 348 (0) 398 (0.2) 351 (0) 440 (26.2)

353 (0) 366 (0) 402 (18.4) 496 (47.6) 563 (8.1)

406 (29.3) 372 (46.1) 625 (34.7) 580 (0) 605 (23.2)

544 (64.7) 534 (66.0) 633 (104.7) 622 (107.8) 712 (281.7)

579 (389.7) 585 (402.8) 659 (596.2) 655 (614.4) 718 (97.5)

638.8 (0.5) 627 (0) 721 (0.1) 714 (0) 737 (19.9)

983 (96.0) 976 (172.6) 1261 (215.7) 1259 (353.6) 1192 (212.9)

993 (63.5) 979 (0) 1285 (126.5) 1267 (0) 1413 (221.2)

_____________________ _________________________________

[a] Without scaling factor.[b] Given in parentheses.

**Table S5**. Calculated total energies (hartrees) [a], ZPVE[b] (kcal mol-1) and relative energies RE[c] (kcal mol-1) for SO2-based FSn+1O2n+1F oligomers **9**.

________________________________________________________

Sym[d] EM1[a] ZPVE[b] EM2[c] RE[c]

_____________________________________________

SOF2 Cs -673.15077 5.6 -673.22502

S2O3F2 a C2 -1221.79666 10.9 -1221.92202

S3O5F2 a C1 -1770.44262 16.8 -1770.62110 0

b C1 -1770.43291 16.2 -1770.61423 +5.5

S4O7F2 a C2 -2319.08978 21.5 -2319.32132 0

b C1 -2319.08937 21.5 -2319.31741 +2.4

S5O9F2 a C1 -2867.73451 26.7 -2868.01846 0

b C1 -2867.73442 26.7 -2868.01568 +0.1

S6O11F2 a C2 -3416.38187 32.2 -3416.71758

S7O13F2 a C1 -3965.02583 - -3965.41522

S8O15F2 a C2 -4513.67325 - -4514.11307

________________________________________________________

[a] B3LYP/6-311G* geometry . [b] B3LYP/6-311G* Zero-point vibrational energy. [c] B3LYP/6-311+G(3df)// B3LYP/6-311G*. [d] Symmetry group.

**Table S6**. Calculated bond length (Å) along the Sulfur-Oxygen  chain for the FSn+1O2n+1F oligomers **9** at the B3LYP/6-311G* level of theory.

________________________________________________________________

n 1 2 2 b 3 a 3 b 4 a 4 b 5 6 7

__________________________________________________________

r1 1.704 1.663 1.771 1.663 1.644 1.716 1.660 1.661 1.664 1.661

r2 1.704 1.758 1.663 1.758 1.794 1.709 1.761 1.760 1.772 1.760

r3 1.711 1.719 1.703 1.723 1.733 1.667 1.669 1.716 1.669

r4 1.697 1.713 1.703 1.685 1.698 1.768 1.763 1.713 1.764

r5 1.758 1.781 1.769 1.709 1.714 1.727 1.711

r6 1.663 1.648 1.665 1.718 1.714 1.712 1.718

r7  1.7641.769 1.763 1.722 1.719

r8 1.6591.665 1.669 1.706 1.719

r9 1.760 1.770 1.718

r10 1.661 1.665 1.711

r11  1.764 1.764

r12 1.659 1.669

r13  1.760

r14 1.661

_________________________________________________________________

**Table S7**. Calculated S=O bond lengths (Å) for the FSn+1O2n+1F oligomers **9** at the B3LYP/6-311G* level of theory.

______________________________________________________________________

n 0 1 2 2 b 3 a 3 b 4 a 4 b 5 6 7

________________________________________________________________

l1 1.436 1.443 1.448 1.4 1.448 1.450 1.440 1.449 1.448 1.452 1.448

l2 1.443 1.444 1.454 1.447 1.442 1.449 1.455 1.454 1.441 1.454

l3 1.445 1.443 1.447 1.443 1.445 1.444 1.444 1.451 1.444

l4 1.448 1.451 1.454 1.441 1.444 1.452 1.451

l5 1.448 1.452 1.454 1.444 1.451

l6 1.448 1.454 1.444

l7 1.449 1.454

l8 1.448

______________________________________________________________________

**Table S8**. Calculated dihedral angles (°) along the  chain for the FSn+1O2n+1F oligomers **9** at the B3LYP/6-311G* level of theory.

________________________________________________________________

n 1 2 2 b 3 a 3 b 4 a 4 b 5 6 7

__________________________________________________________

1[a]  285.7 283.9 173.7 288.5 279.6 288.4 285.0 287.8 317.1 285.8

2 285.7 310.7 164.9 288.5 252.3 84.6 316.3 287.8 287.1 285.8

1 [b] 275.5 76.8 274.9 324.0 274.1 273.8 273.3 319.2 272.7

2  324.7 69.6 320.0 292.1 323.1 324.7 324.3 298.3 325.7

3  320.0 10.4 315.3 316.7 316.7 295.2 316.4

4  274.9 146.9 300.6 299.3 299.1 322.6 298.7

5  302.2 297.6 299.1 321.1 295.2

6  291.4 319.3 316.7 295.9 321.8

7  324.3 301.0 321.8

8  273.3314.7 295.2

9 324.7 298.7

10 274.1 316.4

11  325.7

12 272.7

________________________________________________________________

[a] , F-S-O-S dihedral angles. [b] , S-O-S-O dihedral angles.

**Table S9**. Calculated total energies (hartrees) [a] and ZPVE[b] (kcal mol-1) for SeO2-based FSen+1O2n+1F oligomers **10**.

______________________________________________________

Sym[c] EM1[a] ZPVE[b] EM2[d]

__________________________________________

SeOF2 Cs -2676.48193 4.4 -2676.53743

Se2O3F2 2a C2 -5228.45880 8.6 -5228.55083

Se3O5F2 3a C1 -7780.44200 13.0 -7780.57102

Se4O7F2 4a C2 -10332.42413 17.2 -10332.59049

______________________________________________________

[a] B3LYP/6-311G* geometry . [b] B3LYP/6-311G* zero-point vibrational energy. [c] Symmetry group. [d] B3LYP/6-311+G(3df)// B3LYP/6-311G*.

**Table S10**. Calculated bond length (Å) along the Selenium-Oxygen  Chain for the FSen+1O2n+1F oligomers **10** at the B3LYP/6-311G* level of theory.

_______________________

n 1 2 3

_________________

r1 1.845 1.861 1.863

r2 1.845 1.838 1.835

r3 1.927 1.848

r4 1.783 1.835

r5 1.863

_______________________

**Table S11**. Calculated Se=O bond lengths (Å) for the FSen+1O2n+1F oligomers **10**

at the B3LYP/6-311G* level of theory.

_____________________________

n 0 1 2 3

_______________________

l1 1.592 1.599 1.607 1.604

l2 1.599 1.600 1.622

l3 1.621 1.622

l4 1.604

_____________________________

**Table S12**. Calculated dihedral angles (°) along the  chain for the FSen+1O2n+1F oligomers **10** at the B3LYP/6-311G* level of theory.

_______________________

n 1 2 3

_________________

1 [a]  285.0 247.7 242.7

2 285.0 300.8 242.7

1 [b] 283.5 299.8

2  352.6 325.8

3  325.8

4  299.8

_______________________

[a] , F-Se-O-Se dihedral angles. [b] , Se-O-Se-O dihedral angles.
